**A genome-wide case-only test for the detection of digenic inheritance in human exomes**

Gaspard Kerner<sup>1,2</sup>, Matthieu Bouaziz<sup>1,2</sup>, Aurélie Cobat<sup>1,2</sup>, Benedetta Bigio<sup>2,3</sup>,  
Andrew T Timberlake<sup>4,5,6,7</sup>, Jacinta Bustamante<sup>1,2,3,8</sup>, Richard P Lifton<sup>4,5,9,10</sup>,  
Jean-Laurent Casanova<sup>1,2,3,5,11</sup> and Laurent Abel<sup>1,2,3,@</sup>

<sup>1</sup>Laboratory of Human Genetics of Infectious Diseases, Necker Branch, INSERM UMR 1163,  
Necker Hospital for Sick Children, Paris, France, EU

<sup>2</sup>Paris Descartes University, Imagine Institute, Paris, France, EU

<sup>3</sup>St Giles Laboratory of Human Genetics of Infectious Diseases, Rockefeller Branch,  
Rockefeller University, New York, NY, USA

<sup>4</sup>Department of Genetics, Yale University School of Medicine, New Haven, USA

<sup>5</sup>Howard Hughes Medical Institute, New York, NY, USA

<sup>6</sup>Section of Plastic and Reconstructive Surgery, Department of Surgery, Yale University  
School of Medicine, New Haven, USA

<sup>7</sup>Hansjörg Wyss Department of Plastic Surgery, New York University Langone Medical  
Center, New York, NY 10016, USA

<sup>8</sup>Study Center for Primary Immunodeficiencies, AP-HP, Necker Hospital for Sick Children,  
Paris, France, EU

<sup>9</sup>Yale Center for Genome Analysis, New Haven, USA

<sup>10</sup>The Rockefeller University, New York, USA

<sup>11</sup>Pediatric Hematology-Immunology Unit, Necker Hospital for Sick Children, AP-HP, Paris, France, EU

@ Corresponding author

Laurent Abel, MD, PhD, Laboratory of Human Genetics of Infectious Diseases, 24 Boulevard du Montparnasse, INSERM UMR1163, Paris, France, EU.

E-mail: [laurent.abel@inserm.fr](mailto:laurent.abel@inserm.fr); Phone: + 33 1 42 75 43 20; Fax: + 33 1 42 75 42 24

**Keywords:** Digenic inheritance, Next generation sequencing, Genome-wide, Case-only, Craniosynostosis

**Abstract.** Whole-exome sequencing (WES) has facilitated the discovery of genetic lesions underlying monogenic disorders. Incomplete penetrance and variable expressivity suggest a contribution of additional genetic lesions to clinical manifestations and outcome. Some monogenic disorders may therefore actually be digenic. However, only a few digenic disorders have been reported, all discovered by candidate gene approaches applied to at least one locus. We propose here a novel two-locus genome-wide test for detecting digenic inheritance in WES data. This approach uses the gene as the unit of analysis and tests all pairs of genes to detect pairwise gene x gene interactions underlying disease. It is a case-only method, which has several advantages over classic case-control tests, in particular by avoiding recruitment and bias of controls. Our simulation studies based on real WES data identified two major sources of type I error inflation in this case-only test: linkage disequilibrium and population stratification. Both were corrected by specific procedures. Moreover, our case-only approach is more powerful than the corresponding case-control test for detecting digenic interactions in various population stratification scenarios. Finally, we validated our unbiased, genome-wide approach by successfully identifying a previously reported digenic lesion in patients with craniosynostosis. Our case-only test is a powerful and timely tool for detecting digenic inheritance in WES data from patients.

**Significance statement.** Despite a growing number of reports of rare disorders not fully explained by monogenic lesions, digenic inheritance has been reported for only 54 diseases to date. The very few existing methods for detecting gene x gene interactions from next-generation sequencing data were generally studied in rare-variant association studies with limited simulation analyses for short genomic regions, under a case-control design. We describe the first case-only approach designed specifically to search for digenic inheritance, which avoids recruitment and bias related to controls. We show, through both extensive

simulation studies on real WES datasets and application to a real example of craniosynostosis, that our method is robust and powerful for the genome-wide identification of digenic lesions.

## 1 INTRODUCTION

2 Next-generation sequencing (NGS) is now widely used and is gradually being  
3 optimized for the detection of rare and common genetic variants underlying human diseases  
4 (1–3). These advances, including whole-exome sequencing (WES), in particular, have led to  
5 major new findings in the field of human genetics, particularly for rare and common  
6 monogenic disorders (4–12). The growing number of reports of incomplete penetrance or  
7 variable expressivity of monogenic disorders suggests that additional genetic contributions,  
8 other than the mono- or biallelic causal lesions, may contribute to clinical manifestations and  
9 outcome (13, 14). Digenic inheritance (DI) is the simplest genetic model of this type with  
10 alleles at two different loci being necessary and sufficient to determine disease status (15, 16).  
11 The recently established Digenic Diseases DAtabase (DIDA) contains detailed information  
12 about DI for 258 reported digenic combinations, corresponding to 54 conditions, since 1994  
13 (17). Well known examples relate to genetic modifier (GM) variants influencing the  
14 expression of the clinical phenotype caused by a primary disease-causing mutation. Cystic  
15 fibrosis (CF) is a classic example of a monogenic disease for which several GM variants have  
16 been identified. An elegant WES-based study showed that two low-frequency (minor allele  
17 frequency [MAF] < 5%) missense variants of *DCTN4* were associated with the severity of  
18 pulmonary *Pseudomonas aeruginosa* infections in CF patients (18). One remarkable example  
19 of DI explaining incomplete penetrance was recently provided for craniosynostosis.  
20 Timberlake et al. (2016) found a highly significant enrichment in rare damaging *SMAD6*  
21 mutations in patients with craniosynostosis (n=191). However, variants were also carried by  
22 13 asymptomatic family members. The authors thus showed that a common variant close to  
23 *BMP2*, a *SMAD6*-related gene, accounted for almost all the observed incomplete penetrance.

24 Only 1% of the 5,442 traits listed in OMIM as single-gene disorders are also known to  
25 display DI and are listed in DIDA. Interestingly, all the lesions known to be caused by defects

26 with DI were discovered in candidate gene studies, rather than through unbiased GW  
27 statistical tests. In some cases, as for the cystic fibrosis example cited above, the defects were  
28 identified by single-gene analyses of patients with known disease-causing variants at the  
29 primary causal locus (18). The craniosynostosis example is unique in that its discovery  
30 involved a combination of GW single-gene analysis with prior knowledge of a common  
31 variant from genome-wide association study (GWAS) data (19, 20). For genetically  
32 heterogeneous diseases, such as Alport syndrome, for which there are three known disease-  
33 causing genes, long-QT syndrome and Bardet-Biedl syndrome, each with more than a dozen  
34 disease-causing genes, the proven digenic combinations display various modes of dominance  
35 and involve the known disease-causing genes (21, 22). However, other GM genes may be  
36 hidden among genes with an unknown functional impact on disease, or even genes with no  
37 detectable main effect. Similarly, many heritable conditions masked in apparently sporadic  
38 cases, for which the genetic etiology remains unknown, may be due to DI.

39         There is, therefore, a need for two-locus GW methods for the detection of DI in NGS  
40 data. WES is a NGS technique focusing on sequencing of protein-coding exons. It is currently  
41 the most cost-effective NGS technology, as variants with a strong effect are more likely to  
42 affect protein-coding sequences than non-coding sequences (23–25). Very few methods have  
43 been developed for detecting gene x gene interactions in the general context of rare variant  
44 association studies; all techniques to date are based on case-control designs (26–28). Here, we  
45 propose a case-only approach to specific searches for DI. This design avoids the need for  
46 control recruitment and the associated bias. Furthermore, case-only approaches have been  
47 shown to be more powerful than classic case-control tests when common variants are tested  
48 for interaction, particularly in the context of GWAS (29–33). Our novel approach is based on  
49 the aggregation of rare variants within a gene as the unit of analysis, overcoming the lack of  
50 power inherent to studies of rare variants. It also greatly decreases the computer time required

51 for interaction analyses, by testing pairwise combinations at the gene level.

52

## 53 MATERIAL AND METHODS

### 54 The variant aggregation model

55 A strategy commonly used for low-frequency variants from NGS data involves tests  
56 based on the aggregation of variants within a genomic region. Several types of tests are used  
57 for this purpose: burden tests, adaptive burden tests, variance-component tests and  
58 combinations of these three classes (34). Here, we propose a method based on the classic  
59 collapsing of variants within the unit of a gene. This approach optimizes statistical power  
60 under a hypothesis of genetic homogeneity, whilst making it possible to assess actual gene x  
61 gene interactions with a number of tests corresponding to the number of possible two-way  
62 combinations of genes. In this study, the aggregation of variants within a gene is based on the  
63 methodology of a class of burden tests known as the “cohort allelic sums test” (CAST).  
64 Formally, for each gene  $j$  and a given subset of variants  $S_j$  observed within this gene, if  $n$  is  
65 the number of individuals studied, we consider the following vector  $(g_{j1}, \dots, g_{jn})$  denoted  
66  $G_j$ . For each  $i = 1, \dots, n$ ,  $g_{ji}$  is then defined as follows:

$$67 \quad g_{ji} = \begin{cases} 1 & \text{if individual } i \text{ carries at least one variant in subset } S_j \\ 0 & \text{otherwise} \end{cases} .$$

68 The term “carries” depends here on the biological inheritance model. For example, in a  
69 dominant model,  $g_{ji} = 1$  if individual  $i$  harbors at least one copy of at least one variant allele  
70 from the set of variants studied  $S_j$  within gene  $j$ . In addition, the choice of  $S_j$  may be based on  
71 different features at the variant level, such as the MAF or functional impact prediction, as  
72 described below.

### 73 The case-control design for interaction

74 Using this notation, data for genes  $k$  and  $j$  in a case-control dataset, with a binary  
 75 disease status  $D$ , can be summarized into two  $2 \times 2$  contingency tables, one for affected  
 76 individuals (cases,  $D=1$ ) and one for unaffected individuals (controls,  $D=0$ ), as in Table 1.  
 77 Based on these tables, let  $N_{kj}^a = (n_{kj,00}^a, n_{kj,10}^a, n_{kj,01}^a, n_{kj,11}^a)$  be a vector of the observed  
 78 numbers of carriers for gene  $k$  and gene  $j$  among cases, such that, for example,  $n_{kj,11}^a =$   
 79  $\sum_{i \text{ in cases}} (g_{ki} \times g_{ji})$ . Similarly, we define  $N_{kj}^u = (n_{kj,00}^u, n_{kj,10}^u, n_{kj,01}^u, n_{kj,11}^u)$  as a vector of  
 80 the observed numbers of carriers for gene  $k$  and gene  $j$  among controls. The odds ratios for  
 81 cases and controls, respectively, for genes  $k$  and, are defined as follows:

$$82 \quad OR_{kj}^a = \frac{n_{kj,11}^a \times n_{kj,00}^a}{n_{kj,10}^a \times n_{kj,01}^a}, \quad OR_{kj}^u = \frac{n_{kj,11}^u \times n_{kj,00}^u}{n_{kj,10}^u \times n_{kj,01}^u}.$$

83 Classic statistical analyses of interaction are based on the comparison of  $OR_{kj}^a$  and  $OR_{kj}^u$ .  
 84 More specifically, the following classic case-control logistic regression model is often used to  
 85 test for interaction:

$$86 \quad \text{logit } P(D = 1) = \beta_0 + \beta_k G_k + \beta_j G_j + \beta_l G_k \times G_j \quad (1),$$

87 where it can be shown that the interaction coefficient,  $\beta_l$  equals  $\log\left(\frac{OR_{kj}^a}{OR_{kj}^u}\right)$ . This model also  
 88 takes main effects into account, by considering coefficient terms for each gene ( $\beta_k$  and  $\beta_j$ ). In  
 89 addition, specific covariates, such as principal components (PCs), can easily be introduced  
 90 into the model. Including a matrix of covariates  $X$  and a vector  $C$  of coefficients, the full  
 91 logistic regression model takes the following form:

$$92 \quad \text{logit } P(D = 1) = \beta_0 + \beta_j G_j + \beta_k G_k + \beta_l G_j \times G_k + CX \quad (2).$$



93 Subsequently, the null hypothesis of no interaction  $\beta_I = 0$  can be tested in a likelihood ratio  
94 test (LRT) with one degree of freedom, in the presence or absence of main genetic effects  
95 and/or covariate effects.

### 96 **The case-only model**

97 Interactions can also be assessed by focusing exclusively on cases, such that all the  
98 information is provided by the 2x2 contingency table for affected individuals (Table 1). In  
99 this situation, the standard full logistic regression model to test for interaction between genes  
100  $G_k$  and  $G_j$  is now written as

$$101 \quad \text{logit } P(G_k = 1) = \gamma_0 + \gamma_I G_j + CX \quad (3),$$

102 where  $\gamma_I$  is equal to  $\log(OR_{kj}^a)$ ,  $X$  is a matrix of covariates and  $C$  a vector of coefficients. As  
103 before, a LRT can be used to test the null hypothesis  $\gamma_I = 0$ .

104 Under the assumption that vectors  $G_k$  and  $G_j$  are not correlated, implying, in particular, that  
105 variants of the two genes are not in linkage disequilibrium (LD), a deviation from 1 of  $OR_{kj}^a$   
106 indicates interaction. In addition, if the disease is rare,  $OR_{kj}^u$  is close to 1, and, consequently,  
107  $\beta_I$  is approximately  $\gamma_I$ . The advantages of this test over case-control tests have been  
108 extensively studied theoretically (29, 33), in particular the gain of power. This gain stands  
109 from the nature of the estimators of the interaction coefficients of both designs. These  
110 estimators depend either on the ratio  $\frac{OR_{kj}^a}{OR_{kj}^u}$  for the case-control or only on  $OR_{kj}^a$  for the case-  
111 only test. The asymptotic variances of the estimators are the sum of the reciprocal counts of  
112 Table 1, either for both affected and unaffected subjects (case-control design), or for affected  
113 individuals only (case-only) (29). Hence, the variance of the estimator of the case-control  
114 interaction coefficient has a larger variance leading to a less powerful test. The advantages  
115 include also the absence of a need to recruit controls, which, in addition to saving time and

116 reducing costs, avoids the problem of the misclassification of individuals with the unaffected  
117 phenotype. The only known limitation of this test is that it assumes independence in the  
118 general population of the variants tested. In fact, our type I error analyses revealed possible  
119 sources of violation of this assumption in the context of WES data that, to our knowledge, had  
120 never before been considered.

## 121 **Samples**

122 For the simulation study we worked on real exome data, using samples from the 1000  
123 Genome project (1000G) populations, and a subset of our in-house exome database, the  
124 Human Genetics of Infectious Diseases (HGID) database. Six populations from the 1000G  
125 database were used: four European populations — the Iberian population in Spain (IBS,  
126  $n=107$ ), Toscani in Italy (TSI,  $n=107$ ), British in England and Scotland (GBR,  $n=91$ ) and  
127 Finnish in Finland (FIN,  $n=99$ ) — and two Asian populations of Chinese origin —Southern  
128 Han Chinese (CHS,  $n=105$ ) and Chinese Dai in Xishuangbanna, China (CDX,  $n=93$ ). From  
129 the HGID database, which includes data for  $> 4,000$  individuals of various ethnic origins,  
130 including patients suffering from severe infectious diseases, we selected 1,331 individuals of  
131 European origin, as defined by principal component analysis (PCA) on WES data, as  
132 previously described (Belkadi, PNAS 2016). Based on a refined PCA on these 1,331  
133 individuals, together with the 404 European 1000G individuals, we identified three distinct  
134 subpopulations (SI Appendix, Fig. S1): “Northern Europeans” (N), “Middle Europeans” (M)  
135 and “Southern Europeans” (S). For the real data analysis we used the craniosynostosis WES  
136 dataset reported in (20) (see *Supplemental Data*).

137

## 138 **RESULTS**

### 139 **Simulation study**

140 We first investigated the properties of our case-only test through simulations on real  
141 exome data from the 1000G populations and a subset of our in-house exome HGID database.  
142 We performed analyses under the null hypothesis of no digenic interactions, for which we  
143 assessed type I errors. We also worked under the alternative hypothesis of a digenic  
144 interaction, for which we assessed statistical power under genetic effects of different  
145 magnitudes. In these analyses, we compared the case-only approach to the corresponding  
146 case-control approach, for various population stratification (PS) scenarios.

### 147 ***Type I error analyses***

148 *Case-only design.* We first performed our case-only test on an ethnically homogeneous  
149 population based on the 214 IBS+TSI 1000G South-European samples. After the application  
150 of quality control filters (see *Supplemental Data*), 1,588 genes for which at least 15% of  
151 individuals carried rare variants were included in the analysis, resulting in 1,260,067  
152 interaction tests. In tests of all possible pairs of genes, we observed a moderate inflation of  
153 type I error to 0.00147 for  $\alpha = 0.1\%$  (Table 2), and 0.0535 for  $\alpha = 5\%$  (Table S1). LD has  
154 been identified as a possible cause of type I error inflation in case-only tests (35). We  
155 therefore assessed the possible effect of LD, by restricting our analysis to pairs of genes  
156 physically separated by a minimal distance  $\delta$  (measured in Mb). Empirical type I errors  
157 decreased with increases in  $\delta$  from 0.1 to 2 Mb (Table S2), and a type I error of 0.00121 was  
158 obtained at a nominal value  $\alpha$  of 0.1% when  $\delta=2$  Mb (Table 2). The distributions of  $p$  values  
159 for tests of pairs of genes with  $\delta < 2$  Mb was strikingly inflated (SI Appendix, Fig. S2). In  
160 particular, the 204  $p$  values  $< 10^{-10}$  observed in the full analysis were all due to tests involving  
161 pairs of genes with  $\delta < 2$  Mb. Type I errors did not improve significantly for  $\delta > 2$  Mb (data not  
162 shown). Globally, these results show that LD accounted for the lowest  $p$  values in the case-  
163 only test. The refined investigation of statistically significant pairs of genes located close  
164 together (680 with  $p < 0.05$  among 4,082 pairs with  $\delta < 2$  Mb in the IBS+TSI cohort) would

165 require a case-control design. Even a small number of controls might help to reveal the true  
166 nature of the statistical signals for these pairs, through an analogous control-only approach,  
167 which would detect only LD. Even so, after simple LD correction based on removing the  
168 pairs of genes with  $\delta < 2$  Mb, type I errors remained slightly above the corresponding upper  
169 limit of the confidence interval. No further improvement was obtained by adjusting our tests  
170 for the first three principal components, consistent with the fact that the IBS and the TSI  
171 populations are very close.

172 *Case-control design.* We conducted an analogous investigation with a case-control  
173 design on an enlarged European population consisting of the 404 IBS+TSI+GBR+FIN 1000G  
174 samples, in order to have ~200 cases and ~200 controls. We first applied it in a population  
175 balanced scenario (Table 2), in which 1,563 genes were retained after the application of  
176 quality control filters (*see Supplemental Data*). No inflation due to LD (as expected in a case-  
177 control design) or PS (as expected for a balanced scenario) was observed. Nevertheless, the  
178 empirical type I error of 0.00128 at  $\alpha = 0.1\%$  indicated that slight inflation, similar to that  
179 observed for the case-only test, also occurred with this test (Table 2). Similar trends were  
180 observed at  $\alpha = 5\%$  (Table S1). We hypothesized that this inflation might be at least partly  
181 due to the small sample sizes in the contingency cells of Table 1. We tested this hypothesis by  
182 repeating the analyses for both the case-only and the case-control tests with more common  
183 variants and a larger number of carriers at the gene level (i.e., variants with a MAF  $< 10\%$  and  
184 genes with carriage rates of at least 25%, and variants with a MAF  $< 15\%$  and genes with  
185 carriage rates of at least 35%; Table 2). The type I error was clearly lower, and improved as  
186 the frequency of variants increased. For both tests, empirical type I errors were within the  
187 boundaries of the confidence interval for  $\alpha = 0.1\%$ , but remained slightly above the upper  
188 limit of this interval for  $\alpha = 5\%$  (Table S1).

189           *Sample size investigation.* We investigated the impact of contingency cell sample sizes  
190 and the number of tests on the case-only approach, by extending the previous scenario to two  
191 new settings with less stringent MAF thresholds. First, we conducted a case-only test for all  
192 genes carried by at least 5% rather than 15% of individuals in the IBS+TSI population. This  
193 strategy increased the number of genes retained to 5,563, and, after the removal of genes in  
194 LD, we tested a total of 15,465,141 pairs of genes and generated the QQ-plot for SI  
195 Appendix, Fig. S3. The type I error was moderately inflated (0.057) for  $\alpha = 5\%$  and there was  
196 a slightly conservative type I error value (0.00085) for  $\alpha = 0.1\%$  (Table S3). Finally, we  
197 simulated the data for one gene considered “rare” (at least 1% carriers, total of 11,470 genes)  
198 and another considered “common” (at least 15% carriers, total of 1,588 genes). Under this  
199 scenario, 16,951,106 pairs of genes were tested, and the QQ-plot for SI Appendix, Fig. S4  
200 was generated. The type I errors of 0.053 and 0.00097 obtained were closer to the expected  
201 values of 5% and 0.1%, respectively (Table S3). These results suggest that the case-only test  
202 is reliable for investigating a large range of carrier frequencies provided that LD is taken into  
203 account.

204           *Population stratification.* We then investigated the effect of PS, again focusing only  
205 on genes for which at least 15% of the individuals in the study population were carriers and  
206 which were separated by at least 2 Mb. For the case-only test, we used the 212 IBS+CHS  
207 samples, and we assessed 1,248 genes, in 776,879 tests (see *Supplemental Data*). Type I  
208 errors were highly inflated (0.0143 for  $\alpha = 0.1\%$  and 0.1264 for  $\alpha = 5\%$ ) (Table 3 and Table  
209 S4). The application of PS correction (adjustment for the first three principal components)  
210 brought empirical type I errors back down to levels very similar to those previously observed  
211 (0.0013 for  $\alpha = 0.1\%$  and 0.0550 for  $\alpha = 5\%$ ). For the case-control test, we used the 412  
212 IBS+TSI+CHS+CDX samples under an unbalanced population scenario, with 1,173 genes  
213 (see *Supplemental Data*). Inflated type I errors were also observed (0.0026 for  $\alpha = 0.1\%$  and

214 0.0687 for  $\alpha = 5\%$ ), although the inflation less striking. Adjustment for principal components  
215 (0.0013 for  $\alpha = 0.1\%$  and 0.0548 for  $\alpha = 5\%$ ) resulted in values similar to those for a situation  
216 without PS (Table 3 and Table S4). Thus, provided that the search space was limited to pairs  
217 of genes far enough apart to avoid LD and adjustment for PCs was applied when required, our  
218 case-only test yielded reasonable type I error rates, similar to those for the analogous case-  
219 control approach.

## 220 *Power analyses*

221 *Average power scenario.* Power studies were conducted on an enlarged European  
222 population consisting of 1,735 individuals from the four European 1000G populations (IBS,  
223 TSI, GBR, FIN) and 1,331 individuals from the in-house HGID database (see *Supplemental*  
224 *Data*). We first estimated an “average” power by testing all possible pairs of genes (scheme  
225 A, Table 4), each with at least 15% carriers and separated by at least 2 Mb. In total, 370,530  
226 tests were performed in 10 replicates (see *Supplemental Data*). Fig. 1 displays the results  
227 obtained for scenarios including one or no main genetic effect, corresponding to the most  
228 pertinent situations in which to search for a gene x gene interaction. Adjusted and non-  
229 adjusted curves were superimposed, indicating that this analysis, in a European population,  
230 was not affected by PS. In all situations, power was always greater for the case-only test than  
231 for the case-control test. For example, a power of 65% at  $\alpha = 0.1\%$  was obtained when  
232  $OR_I = 5$  and no main effects were considered, whereas a power of only 40% was obtained for  
233 the corresponding case-control test in the same conditions. Similar trends were observed  
234 when one main effect was present (Fig. 1 and SI Appendix, Fig. S5) and for assessments of  
235 power at  $\alpha = 5\%$  (data not shown).

236 *Two-gene power scenarios.* We then focused on two specific pairs of genes, without  
237 (*AHNAK*, *PKHD1L1*, scheme 2G, see Table 4) and with (*ARPP21*, *MACF1*, scheme 2GS, see

238 Table 4) PS (see *Supplemental Data*). In the analysis of scheme 2G, the case-only test  
239 performed better, overall, in terms of power (Fig. 2 and SI Appendix, Fig. S6, top figures). In  
240 the absence of main effects, with  $OR_I = 3$  and  $\alpha = 0.1\%$ , a power value of 62% was obtained  
241 for the case-only test, versus only 27% for the case-control test.

242 For scheme 2GS, the power curves for the adjusted and non-adjusted case-only tests  
243 were not superimposed, indicating an effect of PS (Fig. 2 and SI Appendix, Fig. S6, bottom  
244 figures). We therefore used only the adjusted case-only test for comparison. As expected, the  
245 case-control test was not affected by PS (0.0009 for  $\alpha = 0.1\%$ ) and had type I error values  
246 similar to those for the adjusted case-only test (0.0011 for  $\alpha = 0.1\%$ ). The adjusted case-only  
247 test clearly outperformed the case-control test, by reaching a power of 90% when  $OR_I = 5$   
248 without main effects, for example, whereas the corresponding power for the case-control test  
249 was only 60%. Finally, we also considered another specific pair of genes, including one  
250 “common” (26% carriers) and one “rare” (5% carriers) gene (scheme 2GR, see Table 4). The  
251 case-only test was again more powerful than the corresponding case-control test (Fig. 3 and  
252 SI Appendix, Fig. S7), particularly in the absence of main effects, giving an absolute  
253 difference in power of almost 30% when  $OR_I = 10$ . Situations with a lower cumulative  
254 frequency of rare variants and a stronger OR might fit a Mendelian-like disorder hypothesis  
255 better and would be of particular interest concerning the application of this approach to real  
256 data presented below.

### 257 **Real data analysis: craniosynostosis**

258 *Background.* We first applied our test to the dataset that led to the discovery of the  
259 first case of DI of non-syndromic midline craniosynostosis (MIM: 617439) (20). The original  
260 study showed a strong enrichment in rare heterozygous *SMAD6* mutations predicted to be  
261 damaging among cases (13 carriers among the 191 probands). Incomplete penetrance was

262 observed in relatives of the carriers. The role of the common variant *rs1884302* (MAF=0.33  
263 in European populations), located close to the *BMP2* gene and previously associated with  
264 craniosynostosis through GWAS (19), was therefore investigated, and this variant was found  
265 to account for almost all the observed phenotypic variation. Eleven of the 13 *SMAD6*  
266 probands were also carriers of *rs1884302*, whereas none of the healthy *SMAD6* carriers  
267 carried this variant. We used these data to determine whether our unbiased case-only test  
268 could detect this digenic association in the context of a GW search (i.e. without prior  
269 knowledge of the role of the *SMAD6* and *BMP2* variants).

270 *Genome-wide search.* In total, 285,216 tests (83 genes and 8,102 variants) were  
271 conducted on the WES data for 191 patients after the application of quality control and other  
272 filters to the variants and genes (see *Supplemental Data*). The resulting QQ-plot shows no  
273 deviation from the expected distribution, with only one significant result over the expected *p*-  
274 value line (Fig. 4). This result ( $p = 1.58 \times 10^{-6}$ , OR = 30.95) corresponds to the digenic  
275 combination of *SMAD6* and *rs1884302*, and is one order of magnitude higher than the second  
276 result ( $p = 1.04 \times 10^{-5}$ ), which is close to the expected line. The 2x2 contingency table for the  
277 top result is shown in Table S5, and corresponds to the distribution found in the original paper  
278 (20). Thus, the two-locus genome-wide analysis focusing on genes harboring rare variants  
279 together with the potential contribution of a common modifier variant was able to detect the  
280 previously reported DI for craniosynostosis (20). This analysis provides proof-of-concept that  
281 our statistical test can detect DI without the need for biological assumptions concerning the  
282 disease studied, even when the disease is very rare.

283

284 **DISCUSSION**



285           There is increasing evidence to suggest that DI plays an important role in the genetic  
286 architecture of many conditions. The three previously reported approaches searching for gene  
287 x gene interactions in the general context of rare variant association studies are based on case-  
288 control designs (26–28). Moreover, these tests were assessed in limited simulation studies  
289 involving short genomic sequences of less than 500 variants ( $n=1$ ) or only 20 variants ( $n=2$ ),  
290 and were not based on WES-based simulated data. None was reported to have detected two  
291 genetic lesions at the GW level. Indeed, all previously successful DI studies relied on  
292 candidate gene approaches to overcome the lack of appropriate statistical resources to search  
293 for DI at the GW level (17). DI studies and statistical interaction approaches have thus been  
294 following separate paths. We show here, through both extensive simulation studies on real  
295 WES datasets and application to the example of craniosynostosis, that our method is robust  
296 and powerful for the identification of digenic lesions at the GW level. Our unbiased genetic  
297 confirmation of the reported digenic lesions in the craniosynostosis dataset composed only of  
298 exome data from cases, a common feature of real datasets for rare disorders, justifies the  
299 choice of a case-only test based on the aggregation of rare variants. Further strong support for  
300 this approach is provided by the higher overall power for the case-only approach than for the  
301 corresponding case-control test, as shown here, for the same number of cases. We present  
302 here the results for cohorts of at least 200 cases. We recommend using at least 100 cases to  
303 ensure sufficient statistical power, but this is not an absolute requirement as it depends on the  
304 proportion of double carriers among cases (strength of the genetic association).

305           The proposed methodology is simple to apply and flexible. It requires only the  
306 definition of a set of variants for testing, with filters based on features including MAF, variant  
307 annotations, and genetic models, defined before the analysis. It can, of course, be used at the  
308 gene level for the two loci studied. It can also directly assess the role of common variants as  
309 potential modifiers of a known monogenic defect. This assessment is achieved by simply

310 replacing the gene by the variant as the unit of analysis, as illustrated in the craniosynostosis  
311 example. Our result also provide proof-of-concept that incomplete penetrance in disorders  
312 considered to be monogenic can be explained by a unique digenic combination. The  
313 frequency of carriers considered in our simulation studies may appear to be too high, but two  
314 important points must be taken into account when studying a rare disorder. First, these  
315 thresholds correspond to a cumulative frequency of the variants potentially contributing to the  
316 disease. The frequency of each individual allele may be much lower. Second, enrichment in  
317 the true disease-causing alleles would be expected in patients. For example, in the  
318 craniosynostosis dataset, the cumulative frequency of carriers of rare damaging *SMAD6*  
319 mutations is 6.8% (13 of 191), whereas the maximum frequency of carriers of these variants  
320 in gnomAD, which includes data from more than 50,000 individuals, is 0.01%. The proposed  
321 case-only test thus already appears to be a novel, powerful, and timely tool for detecting DI  
322 based on NGS data at the GW level in disorders that are not explained or only partly  
323 explained by a monogenic lesion.

## **FINANCIAL SUPPORT**

The Laboratory of Human Genetics of Infectious Diseases is supported in part by institutional grants from INSERM, Paris Descartes University, St. Giles Foundation, The Rockefeller University Center for Clinical and Translational Science grant number 8UL1TR000043 from the National Center for Research Resources and the National Center for Advancing Sciences (NCATS), National Institutes of Health, ), the TBPATHEGEN project (ANR-14-CE14-0007-01), the National Institute of Allergy and Infectious Diseases (5R01AI089970-02 and 5R37AI095983) and grants from the French National Research Agency (ANR) under the “Investments for the future” program (ANR-10-IAHU-01) and GENMSMD (ANR-16-CE17-0005-01 for JB) grants.

## **ACKNOWLEDGEMENTS**

We would like to thank the patients and their families, whose cooperation was essential for collection of the data used in this study. We thank all members of the Laboratory of Human Genetics of Infectious Diseases for helpful discussions. Céline Desvallées, Tatiana Kochetkov, Dominick Papandrea, Cécile Patissier, Mark Woollett, Amy Gall and Yelena Nemirovskaya for their assistance.

## **DECLARATION OF INTERESTS**

The authors declare no competing interests.

## **URLs**

DIDA, <http://dida.ibsquare.be/>

OMIM, <https://www.omim.org>

gnomAD, <https://gnomad.broadinstitute.org/>

snpEff, <http://snpeff.sourceforge.net/>

## REFERENCES

1. G. Andreoletti, *et al.*, Exome Analysis of Rare and Common Variants within the NOD Signaling Pathway. *Sci Rep* **7**, 46454 (2017).
2. M. J. Bamshad, *et al.*, Exome sequencing as a tool for Mendelian disease gene discovery. *Nat. Rev. Genet.* **12**, 745–755 (2011).
3. C. T. Johansen, *et al.*, Excess of rare variants in genes identified by genome-wide association study of hypertriglyceridemia. *Nat. Genet.* **42**, 684–687 (2010).
4. J. C. Cohen, H. H. Hobbs, Simple Genetics for a Complex Disease. *Science* **340**, 689–690 (2013).
5. S. Boisson-Dupuis, *et al.*, Tuberculosis and impaired IL-23–dependent IFN- $\gamma$  immunity in humans homozygous for a common TYK2 missense variant. *Science Immunology* **3**, eaau8714 (2018).
6. P. K. Brastianos, *et al.*, Exome sequencing identifies BRAF mutations in papillary craniopharyngiomas. *Nat. Genet.* **46**, 161–165 (2014).
7. M. Choi, *et al.*, Genetic diagnosis by whole exome capture and massively parallel DNA sequencing. *Proc. Natl. Acad. Sci. U.S.A.* **106**, 19096–19101 (2009).
8. J. Kaiser, Human genetics. Affordable “exomes” fill gaps in a catalog of rare diseases. *Science* **330**, 903 (2010).
9. I. Meyts, *et al.*, Exome and genome sequencing for inborn errors of immunity. *J. Allergy Clin. Immunol.* **138**, 957–969 (2016).
10. S. B. Ng, *et al.*, Targeted capture and massively parallel sequencing of 12 human exomes. *Nature* **461**, 272–276 (2009).
11. D. B. Zastrow, *et al.*, Exome sequencing identifies de novo pathogenic variants in FBN1 and TRPS1 in a patient with a complex connective tissue phenotype. *Cold Spring Harb Mol Case Stud* **3**, a001388 (2017).
12. V. G. Sankaran, *et al.*, Exome sequencing identifies GATA1 mutations resulting in Diamond-Blackfan anemia. *J. Clin. Invest.* **122**, 2439–2443 (2012).
13. C. J. Bell, *et al.*, Carrier Testing for Severe Childhood Recessive Diseases by Next-Generation Sequencing. *Sci Transl Med* **3**, 65ra4 (2011).
14. D. N. Cooper, M. Krawczak, C. Polychronakos, C. Tyler-Smith, H. Kehrer-Sawatzki, Where genotype is not predictive of phenotype: towards an understanding of the molecular basis of reduced penetrance in human inherited disease. *Hum Genet* **132**, 1077–1130 (2013).
15. C. Deltas, Digenic inheritance and genetic modifiers. *Clin. Genet.* **93**, 429–438 (2018).

16. A. A. Schäffer, Digenic inheritance in medical genetics. *J. Med. Genet.* **50**, 641–652 (2013).
17. A. M. Gazzo, *et al.*, DIDA: A curated and annotated digenic diseases database. *Nucleic Acids Res.* **44**, D900-907 (2016).
18. M. J. Emond, *et al.*, Exome sequencing of extreme phenotypes identifies DCTN4 as a modifier of chronic *Pseudomonas aeruginosa* infection in cystic fibrosis. *Nat. Genet.* **44**, 886–889 (2012).
19. C. M. Justice, *et al.*, A genome-wide association study identifies susceptibility loci for nonsyndromic sagittal craniosynostosis near BMP2 and within BBS9. *Nat. Genet.* **44**, 1360–1364 (2012).
20. A. T. Timberlake, *et al.*, Two locus inheritance of non-syndromic midline craniosynostosis via rare SMAD6 and common BMP2 alleles. *Elife* **5** (2016).
21. M. A. Mencarelli, *et al.*, Evidence of digenic inheritance in Alport syndrome. *J. Med. Genet.* **52**, 163–174 (2015).
22. Westenskow Peter, Splawski Igor, Timothy Katherine W., Keating Mark T., Sanguinetti Michael C., Compound Mutations. *Circulation* **109**, 1834–1841 (2004).
23. A. Belkadi, *et al.*, Whole-genome sequencing is more powerful than whole-exome sequencing for detecting exome variants. *PNAS* **112**, 5473–5478 (2015).
24. D. Botstein, N. Risch, Discovering genotypes underlying human phenotypes: past successes for mendelian disease, future approaches for complex disease. *Nat. Genet.* **33 Suppl**, 228–237 (2003).
25. J. Majewski, J. Schwartzentruber, E. Lalonde, A. Montpetit, N. Jabado, What can exome sequencing do for you? *J. Med. Genet.* **48**, 580–589 (2011).
26. R. Fan, S.-H. Lo, A Robust Model-free Approach for Rare Variants Association Studies Incorporating Gene-Gene and Gene-Environmental Interactions. *PLOS ONE* **8**, e83057 (2013).
27. M. Kwon, S. Leem, J. Yoon, T. Park, GxGrare: gene-gene interaction analysis method for rare variants from high-throughput sequencing data. *BMC Systems Biology* **12**, 19 (2018).
28. J. Zhao, Y. Zhu, M. Xiong, Genome-wide gene-gene interaction analysis for next-generation sequencing. *Eur. J. Hum. Genet.* **24**, 421–428 (2016).
29. P. S. Albert, D. Ratnasinghe, J. Tangrea, S. Wacholder, Limitations of the case-only design for identifying gene-environment interactions. *Am. J. Epidemiol.* **154**, 687–693 (2001).
30. W. J. Gauderman, Sample size requirements for association studies of gene-gene interaction. *Am. J. Epidemiol.* **155**, 478–484 (2002).

31. P. Kraft, Y.-C. Yen, D. O. Stram, J. Morrison, W. J. Gauderman, Exploiting gene-environment interaction to detect genetic associations. *Hum. Hered.* **63**, 111–119 (2007).
32. B. L. Pierce, H. Ahsan, Case-only Genome-wide Interaction Study of Disease Risk, Prognosis and Treatment. *Genet Epidemiol* **34**, 7–15 (2010).
33. Q. Yang, M. J. Khoury, F. Sun, W. D. Flanders, Case-only design to measure gene-gene interaction. *Epidemiology* **10**, 167–170 (1999).
34. S. Lee, G. R. Abecasis, M. Boehnke, X. Lin, Rare-variant association analysis: study designs and statistical tests. *Am. J. Hum. Genet.* **95**, 5–23 (2014).
35. P. Yadav, S. Freitag-Wolf, W. Lieb, M. Krawczak, The role of linkage disequilibrium in case-only studies of gene-environment interactions. *Hum. Genet.* **134**, 89–96 (2015).

## FIGURE TITLES AND LEGENDS

**Fig. 1. Power of the case-only and case-control tests for the analysis of all pairs of genes (scheme A).**

Power values are presented as a % for a type I error of 0.1%, as a function of the odds ratio for interaction ( $OR_I$ ), for the case-only (dark curves) and case-control (light curves) tests with (dotted lines with symbols) or without (solid lines without symbols) adjustment for the first three principal components. The left panel is obtained when no main gene effects are present, whereas the right panel shows results with a main effect of the second gene ( $OR=2$ ). Note that the results with and without adjustment are very similar and the strong superimposition of the corresponding curves.

**Fig. 2. Power of the case-only and case-control tests for the analysis of two specific pairs of genes in the absence (scheme 2G) or presence (scheme 2GS) of population stratification.**

Power values are presented as in Figure 1. Results are shown for the analysis of A) the two non-stratified genes *PKHD1L1* and *AHNAK* (scheme 2G, top figure), and B) the two stratified genes *ARPP21* and *MACF1* (scheme 2GS, bottom figure). The left panel is obtained when no main gene effects are present whereas the right panel shows results with a main effect ( $OR=2$ ) of the second gene, i.e. *AHNAK* and *MACF1* respectively.

**Fig. 3. Power of the case-only and case-control tests for analyzing a pair of genes with different proportions of variant carriers (scheme 2GR).**

Power curves are presented as in Figure 1. Results are shown for the analysis of one “common” (*AHNAK*) and one “rare” gene (*MPCI*) (scheme 2GR). The left panel is obtained



when no main effects are present, whereas the right pannel shows results with a main effect (OR=2) of the second gene, i.e. MPC1.

**Fig. 4. QQ-plot for the genome-wide case-only test conducted on the 191 craniosynostosis probands.**

QQ-plot for a genome-wide analysis under a dominant mode of inheritance, adjusted for the first three principal components, and considering pairs of genes and variants at least 2 Mb apart with > 5% carriers of rare variants a world-wide frequency > 10% for the variant ( $n = 285,216$  pairs).

## TABLES

**Table 1. Contingency table of carriers of rare variants for a given pair of genes  $k$  and  $j$  for affected and unaffected individuals.**

|              | Gene $k$      |               |
|--------------|---------------|---------------|
|              | Carriers      | Non carriers  |
| Gene $j$     |               |               |
| Carriers     | $n_{kj,11}^i$ | $n_{kj,01}^i$ |
| Non carriers | $n_{kj,10}^i$ | $n_{kj,00}^i$ |

<sup>a</sup>  $i = \{a, u\}$ . When  $i = a$ ,  $n$  stands for the number of affected individuals, when  $i = u$ ,  $n$  stands for the number of unaffected individuals.

**Table 2. Empirical type I errors at a nominal value of  $\alpha = 0.1\%$  for the case-only and case-control tests in the absence of population stratification.**

| Design                            | Model                              |                                    |                                    |                             |                             |
|-----------------------------------|------------------------------------|------------------------------------|------------------------------------|-----------------------------|-----------------------------|
|                                   | $Pg_0^a$                           | $Pg_2^b$                           | $Pg_2 + 3PC^c$                     | $Pg_2 + C_{25}^d$           | $Pg_2 + C_{35}^e$           |
| Case-only<br>(IBS+TSI)            | <i>0.00147</i><br>[0.0009-0.00110] | <i>0.00121</i><br>[0.0009-0.00110] | <i>0.00133</i><br>[0.0009-0.00110] | 0.00109<br>[0.0009-0.00113] | 0.00108<br>[0.0009-0.00114] |
| Case-control<br>(IBS+TSI+GBR+FIN) | <i>0.00128</i><br>[0.0009-0.00110] | <i>0.00128</i><br>[0.0009-0.00110] | <i>0.00130</i><br>[0.0009-0.00110] | 0.00107<br>[0.0009-0.00113] | 0.00103<br>[0.0009-0.00114] |

Note: Boundaries of the 95% confidence intervals are shown in brackets. Type I error values lying outside the 95% confidence interval's boundaries are in italic.

<sup>a</sup> All pairs of genes with >15% of carriers of variants with MAF<5%.

<sup>b</sup> Pairs of genes as  $Pg_0$  but with genes apart by at least 2 Mb.

<sup>c</sup> Pairs of genes as  $Pg_2$  with adjustment on the first three principal components.

<sup>d</sup> Pairs of genes as  $Pg_2$  with >25% of carriers of variants with MAF<10%.

<sup>e</sup> Pairs of genes as  $Pg_2$  with >35% of carriers of variants with MAF<15%.

**Table 3. Empirical type I errors at a nominal value of  $\alpha = 0.1\%$  for the case-only and case-control tests in the presence of population stratification.**

| Design                                          | PC adjustment                      |                                    |
|-------------------------------------------------|------------------------------------|------------------------------------|
|                                                 | No adjustment                      | 3PC                                |
| Case-only <sup>a</sup><br>(IBS+CHS)             | <i>0.01432</i><br>[0.0009-0.00113] | <i>0.00135</i><br>[0.0009-0.00113] |
| Case-control<br>Balanced<br>(IBS+TSI+CHS+CDX)   | <i>0.00132</i><br>[0.0009-0.00113] | <i>0.00136</i><br>[0.0009-0.00113] |
| Case-control<br>Unbalanced<br>(IBS+TSI+CHS+CDX) | <i>0.00257</i><br>[0.0009-0.00113] | <i>0.00126</i><br>[0.0009-0.00113] |

Note: Boundaries of the 95% confidence intervals are shown in brackets. Type I error values lying outside the 95% confidence interval's boundaries are in italic.

<sup>a</sup> Using pairs of genes with genes apart by at least 2 Mb.

**Table 4. Description of the schemes used in the *Power* section of the *Results*.**

|                       |             | Schemes     |                                              |                                          |                                                      |
|-----------------------|-------------|-------------|----------------------------------------------|------------------------------------------|------------------------------------------------------|
|                       |             | A           | 2G                                           | 2GS                                      | 2GR                                                  |
| Genes tested          | Genome-wide |             |                                              | 2 genes                                  |                                                      |
| Genes characteristics | All genes   |             | Both common and non-stratified by population | Both common and stratified by population | One common and one rare non-stratified by population |
| $OR_j^a$              | {1,2}       | {1,2}       | {1,2}                                        | {1,2}                                    | {1,2}                                                |
| $OR_k^a$              | {1,2}       | {1,2}       | {1,2}                                        | {1,2}                                    | {1,2}                                                |
| $OR_I^b$              | {1, ..., 5} | {1, ..., 5} | {1, ..., 5}                                  | {1, ..., 5}                              | {1, ..., 10}                                         |

<sup>a</sup>  $OR_j$  and  $OR_k$  are the odds ratios for the main effect of the first and the second gene of each pair, respectively.

<sup>b</sup>  $OR_I$  is the odds ratio for the interaction term of Eq. 1.



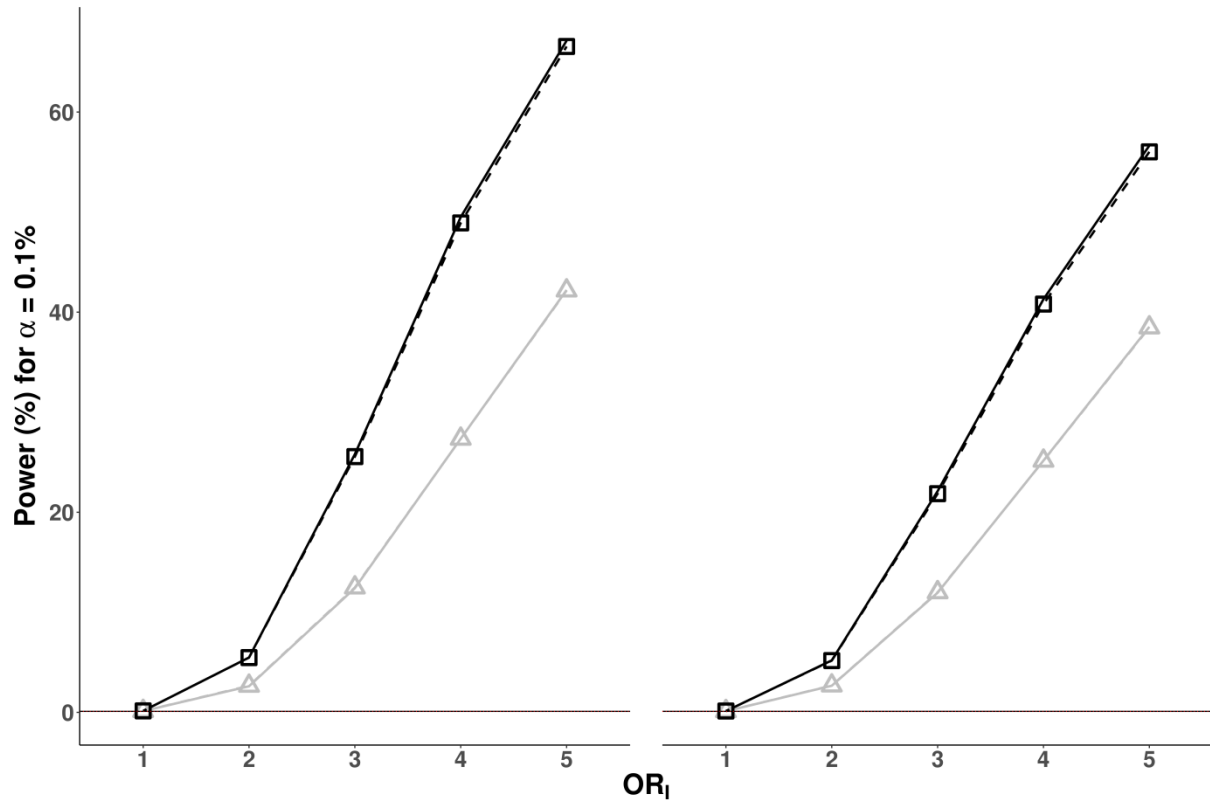

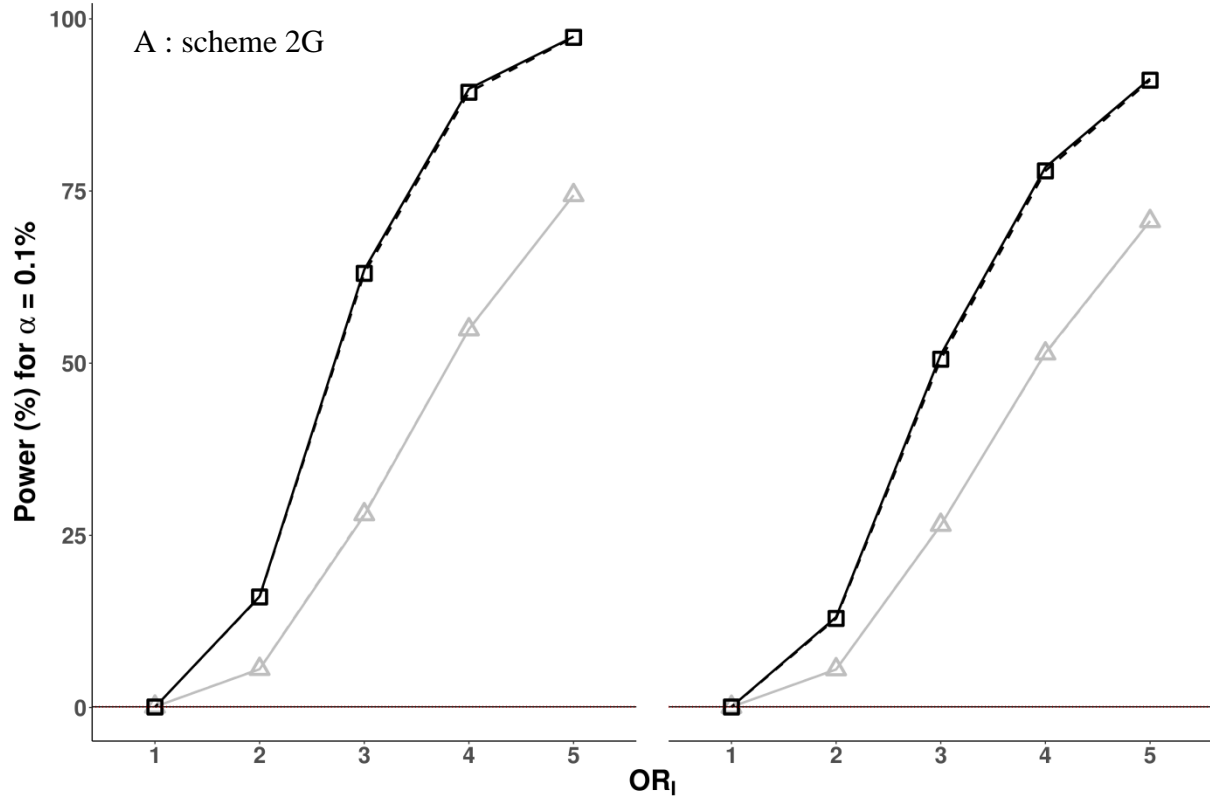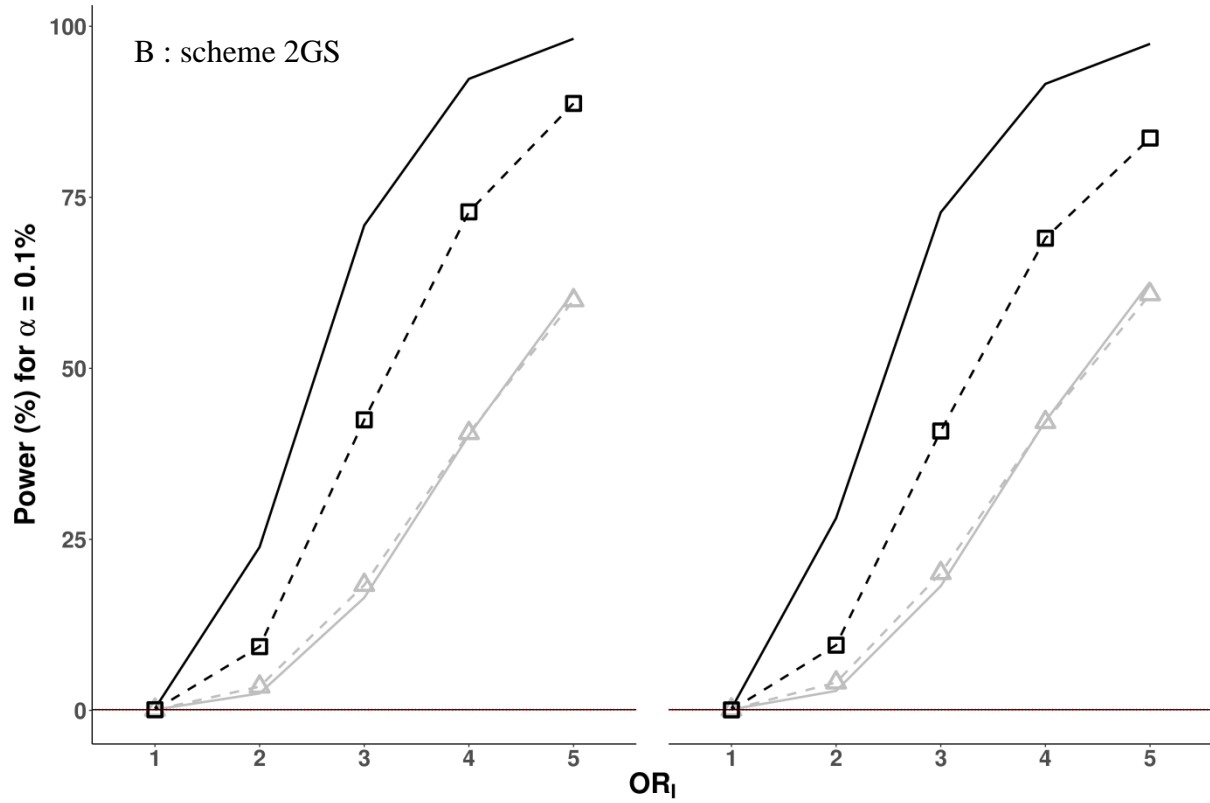



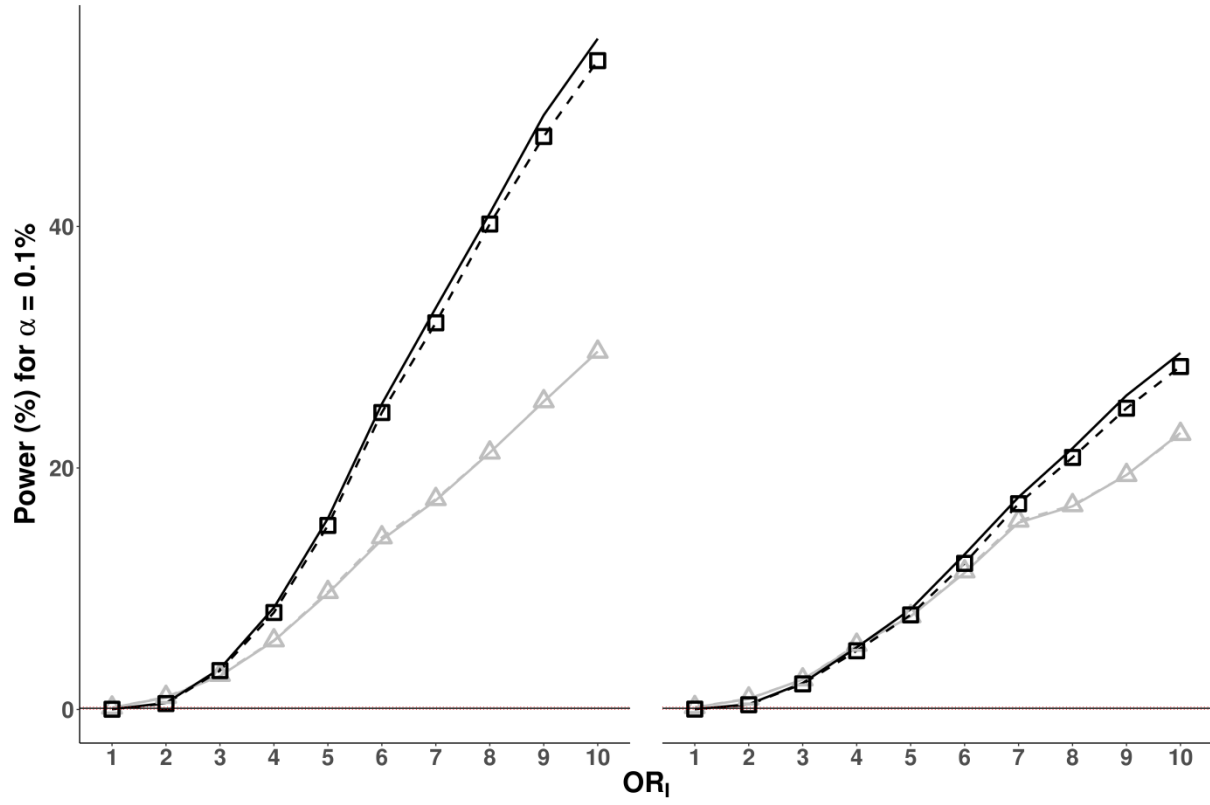

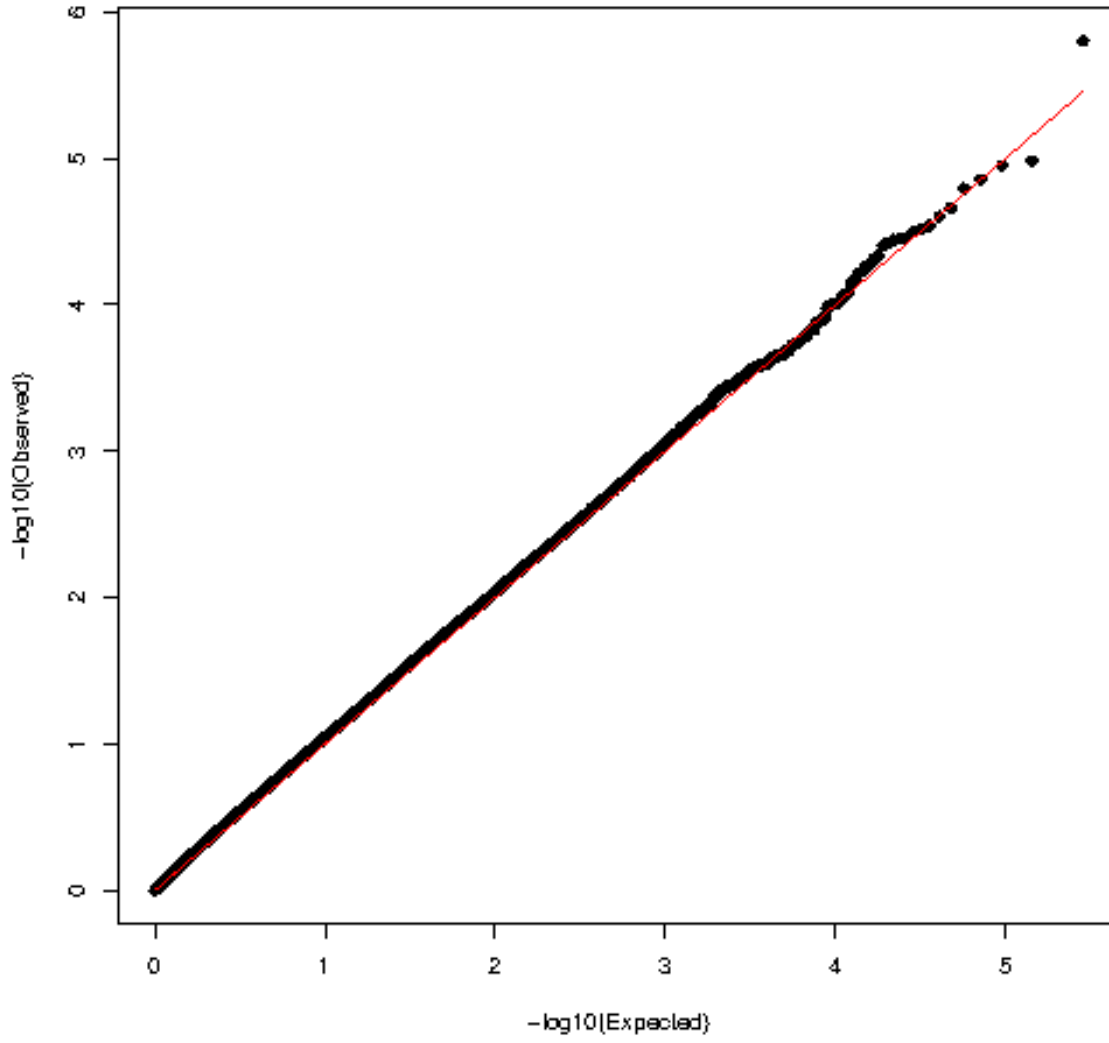

Source: https://www.biorxiv.org/content/biorxiv/early/2020/02/07/2020.02.06.936922.full.pdf
